# Supplementary material for: Metaanalyse zur Wirksamkeit einer Förderung der phonologischen Bewusstheit in der deutschen Sprache
Source: Atypon-hosted journal article supplement (doi:10.1024/1010-0652/a000165), 2016-02-01
Supplement: 1010-0652_a000165_esm1.pdf [file 1010-0652_a000165_esm1.pdf]

Tabelle 1. Online Supplement

Fördermaßnahmen in der Kita

| Studie                                                     | Merkmale der Untersuchung                                   |                       | Merkmale der Stichprobe |                   |                                   | Merkmale der Förderung      |                                    |                                  | Implementationsqualität   |                          |                            | pB (kurzfristig) |       | pB (mittelfristig) |       | DF (kurz- bis mittelfristig) |       | DF (langfristig) |       | LV (kurz- bis langfristig) |       | RS (kurz- bis mittelfristig) |       | RS (langfristig) |       |       |      |
|------------------------------------------------------------|-------------------------------------------------------------|-----------------------|-------------------------|-------------------|-----------------------------------|-----------------------------|------------------------------------|----------------------------------|---------------------------|--------------------------|----------------------------|------------------|-------|--------------------|-------|------------------------------|-------|------------------|-------|----------------------------|-------|------------------------------|-------|------------------|-------|-------|------|
|                                                            | Untersuchungsgruppen                                        | Jahr der Untersuchung | Ausgangskompetenzen     | Sprachhintergrund | Vergleichbare Ausgangskompetenzen | Förderprogramm <sup>1</sup> | Inhalte der Förderung <sup>2</sup> | weitere Inhalte (x) <sup>3</sup> | Gruppengröße <sup>4</sup> | Schulung der Förderkraft | Forscherguppe <sup>5</sup> | Dauer in Minuten | g     | v                  | g     | v                            | g     | v                | g     | v                          | g     | v                            | g     | v                | g     | v     |      |
|                                                            |                                                             |                       |                         |                   |                                   |                             |                                    |                                  |                           |                          |                            |                  |       |                    |       |                              |       |                  |       |                            |       |                              |       |                  |       |       |      |
| Blatter et al., 2013                                       | keine deutschsprachigen Eltern                              | nach 2001             | unauffällig             | nicht deutsch     | ja                                | HLL                         | pB + BLT                           | -                                | klein                     | lang                     | Wü                         | 1300             | 0.81  | 0.05               | (-)   | (-)                          | (-)   | (-)              | 0.62  | 0.06                       | 0.49  | 0.05                         | (-)   | (-)              | 0.59  | 0.05  |      |
| Blatter et al., 2013                                       | zwei deutschsprachige Eltern                                | bis 2001              | unauffällig             | deutsch           | ja                                | HLL                         | pB + BLT                           | -                                | klein                     | lang                     | Wü                         | 1300             | 0.59  | 0.09               | (-)   | (-)                          | (-)   | (-)              | 0.15  | 0.01                       | 0.10  | 0.01                         | (-)   | (-)              | 0.07  | 0.01  |      |
| Blaser, 2002                                               | unauffällige Ausgangskompetenzen                            | bis 2001              | unauffällig             | deutsch           | nein                              | PPP                         | pB + BLT                           | -                                | groß                      | lang                     | andere                     | 1105             | 0.17  | 0.29               | 0.05  | 0.01                         | (-)   | (-)              | -0.20 | 0.04                       | (-)   | (-)                          | (-)   | (-)              | (-)   | (-)   |      |
| Blaser, 2002                                               | schwache Ausgangskompetenzen                                | bis 2001              | schwach                 | deutsch           | ja                                | PPP                         | pB + BLT                           | -                                | groß                      | lang                     | andere                     | 1105             | 0.56  | 0.14               | 0.37  | 0.02                         | (-)   | (-)              | -0.27 | 0.31                       | (-)   | (-)                          | (-)   | (-)              | (-)   | (-)   |      |
| Blaser et al., 2007                                        |                                                             | bis 2001              | unauffällig             | deutsch           | ja                                | PPP                         | pB + BLT                           | -                                | groß                      | lang                     | andere                     | 1105             | (-)   | (-)                | (-)   | (-)                          | (-)   | (-)              | (-)   | (-)                        | (-)   | (-)                          | (-)   | (-)              | (-)   | -0.44 | 0.04 |
| Degé & Schwarzer, 2011                                     |                                                             | nach 2001             | unauffällig             | deutsch           | ja                                | HLL                         | pB                                 | -                                | klein                     | keine                    | andere                     | 1300             | 0.84  | 0.16               | (-)   | (-)                          | (-)   | (-)              | (-)   | (-)                        | (-)   | (-)                          | (-)   | (-)              | (-)   | (-)   |      |
| Fröhlich et al., 2009; Rißling et al., 2011                |                                                             | nach 2001             | unauffällig             | deutsch           | nein                              | Globo_K                     | pB + BLT + X                       | Tv, dK                           | klein                     | kurz                     | andere                     | 720              | 0.62  | 0.00               | (-)   | (-)                          | (-)   | (-)              | (-)   | (-)                        | 0.35  | 0.08                         | (-)   | (-)              | 0.52  | 0.04  |      |
| Fröhlich et al., 2011; Rißling et al., 2011                | Förderung im letzten Kita- und ersten Schuljahr             | nach 2001             | unauffällig             | deutsch           | ja                                | Globo_K + Globo_S           | pB + BLT + X                       | Tv, dK                           | (-)                       | kurz                     | andere                     | 1080             | 1.04  | 0.03               | (-)   | (-)                          | (-)   | (-)              | (-)   | (-)                        | 0.98  | 0.07                         | 0.50  | 0.03             | (-)   | (-)   |      |
| Fröhlich et al., 2011                                      | Förderung im letzten Kitajahr                               | nach 2001             | unauffällig             | deutsch           | ja                                | Globo_K                     | pB + BLT + X                       | Tv, dK                           | klein                     | kurz                     | andere                     | 720              | 0.42  | 0.02               | (-)   | (-)                          | (-)   | (-)              | (-)   | (-)                        | (-)   | (-)                          | (-)   | (-)              | (-)   | (-)   |      |
| Hartmann, 2002                                             |                                                             | bis 2001              | schwach                 | deutsch           | ja                                | EE                          | pB + BLT                           | -                                | einzel                    | kurz                     | andere                     | 2400             | 0.90  | 0.10               | -0.18 | 0.10                         | -0.17 | 0.10             | (-)   | (-)                        | (-)   | (-)                          | -0.12 | 0.10             | (-)   | (-)   |      |
| Henning, 2005; Polotzek, 2007                              |                                                             | nach 2001             | unauffällig             | deutsch           | ja                                | HLL                         | pB                                 | -                                | groß                      | lang                     | andere                     | 1300             | 0.28  | 0.05               | 0.16  | 0.03                         | (-)   | (-)              | 0.18  | 0.03                       | (-)   | (-)                          | (-)   | (-)              | 0.26  | 0.01  |      |
| Jäger et al., 2012                                         | mit Migrationshintergrund ohne Migrationshintergrund        | nach 2001             | unauffällig             | nicht deutsch     | ja                                | HLL                         | pB + BLT                           | -                                | klein                     | lang                     | Wü                         | 1300             | 0.60  | 0.01               | 0.33  | 0.06                         | (-)   | (-)              | (-)   | (-)                        | (-)   | (-)                          | (-)   | (-)              | (-)   | (-)   |      |
| Jäger et al., 2012                                         |                                                             | nach 2001             | unauffällig             | deutsch           | ja                                | HLL                         | pB + BLT                           | -                                | klein                     | lang                     | Wü                         | 1300             | 0.79  | 0.05               | 0.25  | 0.03                         | (-)   | (-)              | (-)   | (-)                        | (-)   | (-)                          | (-)   | (-)              | (-)   | (-)   |      |
| Küspert, 1998                                              |                                                             | bis 2001              | unauffällig             | deutsch           | nein                              | HLL                         | pB                                 | -                                | klein                     | lang                     | Wü                         | 1560             | 0.93  | 0.01               | 0.71  | 0.03                         | 0.45  | 0.01             | (-)   | (-)                        | -0.18 | 0.02                         | 0.39  | 0.01             | (-)   | (-)   |      |
| Marx et al., 2005a, 2005b                                  | kein Grammatikdefizit                                       | nach 2001             | unauffällig             | deutsch           | ja                                | HLL                         | pB + BLT                           | -                                | einzel                    | keine                    | Wü                         | 1300             | 0.34  | 0.13               | 0.07  | 0.09                         | (-)   | (-)              | -0.18 | 0.09                       | -0.09 | 0.09                         | (-)   | (-)              | -0.13 | 0.04  |      |
| Marx et al., 2005a, 2005b                                  | mit Grammatikdefizit                                        | nach 2001             | schwach                 | deutsch           | ja                                | HLL                         | pB + BLT                           | -                                | einzel                    | keine                    | Wü                         | 1300             | 0.17  | 0.06               | 0.18  | 0.20                         | (-)   | (-)              | -0.43 | 0.21                       | -0.13 | 0.20                         | (-)   | (-)              | 0.14  | 0.11  |      |
| May & Okwume, 1999                                         | pB-Förderung und BLT                                        | bis 2001              | unauffällig             | deutsch           | nein                              | ESK                         | pB + BLT                           | -                                | groß                      | lang                     | andere                     | (-)              | -0.02 | 0.06               | 0.33  | 0.22                         | (-)   | (-)              | (-)   | (-)                        | (-)   | (-)                          | 0.16  | 0.24             | (-)   | (-)   |      |
| May & Okwume, 1999                                         | nur pB-Förderung                                            | bis 2001              | unauffällig             | deutsch           | ja                                | HLL*                        | pB                                 | -                                | groß                      | lang                     | andere                     | (-)              | 0.35  | 0.05               | 0.61  | 0.06                         | (-)   | (-)              | (-)   | (-)                        | (-)   | (-)                          | -0.65 | 0.14             | (-)   | (-)   |      |
| Noack & Brändel, 2007                                      |                                                             | nach 2001             | unauffällig             | deutsch           | nein                              | HLL                         | pB                                 | -                                |                           | lang                     | andere                     | 1300             | 0.18  | 0.15               | (-)   | (-)                          | (-)   | (-)              | (-)   | (-)                        | (-)   | (-)                          | (-)   | (-)              | (-)   | (-)   |      |
| Petermann et al., 2010                                     |                                                             | nach 2001             | unauffällig             | deutsch           | ja                                | Globo_E                     | pB                                 | -                                | einzel                    | lang                     | andere                     | 900              | 0.37  | 0.03               | (-)   | (-)                          | (-)   | (-)              | (-)   | (-)                        | (-)   | (-)                          | (-)   | (-)              | (-)   | (-)   |      |
| Röhr-Sendmeier & Krag, 2007; Röhr-Sendmeier & Renger, 2008 |                                                             | nach 2001             | unauffällig             | deutsch           | ja                                | Heifer                      | pB + BLT                           | -                                | (-)                       | keine                    | andere                     | 1272             | 0.60  | 0.24               | 0.73  | 0.02                         | (-)   | (-)              | (-)   | (-)                        | (-)   | (-)                          | 0.77  | 0.04             | 0.39  | 0.08  |      |
| Rothe, 2007                                                | Förderung im letzten Kita- und ersten Schuljahr             | bis 2001              | unauffällig             | deutsch           | nein                              | HLL + Hexe Susi             | pB + BLT + X                       | sL                               | (-)                       | (-)                      | andere                     | 3900             | (-)   | (-)                | (-)   | (-)                          | 0.06  | 0.11             | (-)   | (-)                        | (-)   | (-)                          | -0.15 | 0.11             | (-)   | (-)   |      |
| Rothe, 2007                                                | Förderung in letzten beiden Kitajahren und ersten Schuljahr | bis 2001              | unauffällig             | deutsch           | nein                              | HLL + Hexe Susi             | pB + BLT + X                       | sL                               | (-)                       | (-)                      | andere                     | 5460             | (-)   | (-)                | (-)   | (-)                          | -0.30 | 0.12             | (-)   | (-)                        | (-)   | (-)                          | 0.11  | 0.12             | (-)   | (-)   |      |
| Rothe, 2007                                                | Förderung im vorletzten Kitajahr                            | bis 2001              | unauffällig             | deutsch           | nein                              | HLL                         | pB                                 | -                                | klein                     | kurz                     | andere                     | 1300             | 0.70  | 0.13               | 0.35  | 0.12                         | (-)   | (-)              | (-)   | (-)                        | (-)   | (-)                          | (-)   | (-)              | (-)   | (-)   |      |
| Rothe, 2007                                                | Förderung im letzten Kitajahr                               | bis 2001              | unauffällig             | deutsch           | nein                              | HLL                         | pB                                 | -                                | klein                     | kurz                     | andere                     | 1300             | 0.90  | 0.12               | 0.78  | 0.12                         | (-)   | (-)              | (-)   | (-)                        | (-)   | (-)                          | (-)   | (-)              | (-)   | (-)   |      |
| Rothe, 2007                                                | Förderung im vorletzten und letzten Kitajahr                | bis 2001              | unauffällig             | deutsch           | nein                              | HLL                         | pB                                 | -                                | klein                     | kurz                     | andere                     | 2600             | 1.36  | 0.15               | 1.15  | 0.14                         | (-)   | (-)              | (-)   | (-)                        | (-)   | (-)                          | (-)   | (-)              | (-)   | (-)   |      |
| Rückert et al., 2010                                       |                                                             | nach 2001             | unauffällig             | deutsch           | ja                                | LuL                         | pB + BLT + X                       | dL                               | einzel                    | lang                     | andere                     | 1040             | 0.40  | 0.02               | (-)   | (-)                          | (-)   | (-)              | (-)   | (-)                        | (-)   | (-)                          | (-)   | (-)              | (-)   | (-)   |      |
| Schneider et al., 1997, Studie 1                           |                                                             | bis 2001              | unauffällig             | deutsch           | ja                                | HLL                         | pB                                 | -                                | klein                     | kurz                     | Wü                         | 1560             | 0.65  | 0.01               | 0.38  | 0.01                         | 0.26  | 0.01             | -0.22 | 0.01                       | (-)   | (-)                          | 0.29  | 0.02             | -0.11 | 0.02  |      |
| Schneider et al., 1997, Studie 2                           |                                                             | bis 2001              | unauffällig             | deutsch           | nein                              | HLL                         | pB                                 | -                                | klein                     | lang                     | Wü                         | 1560             | (-)   | (-)                | (-)   | (-)                          | (-)   | (-)              | 0.26  | 0.01                       | (-)   | (-)                          | (-)   | (-)              | 0.54  | 0.01  |      |
| Schneider et al., 1998                                     |                                                             | bis 2001              | schwach                 | deutsch           | ja                                | HLL                         | pB                                 | -                                | klein                     | lang                     | Wü                         | 1560             | 1.28  | 0.06               | 1.39  | 0.06                         | 0.46  | 0.05             | 0.26  | 0.05                       | (-)   | (-)                          | 0.55  | 0.02             | 0.85  | 0.05  |      |

|                        |                         |           |             |               |     |     |          |   |       |       |        |      |      |      |      |      |     |     |      |      |      |      |     |     |     |
|------------------------|-------------------------|-----------|-------------|---------------|-----|-----|----------|---|-------|-------|--------|------|------|------|------|------|-----|-----|------|------|------|------|-----|-----|-----|
| Schöppe et al., 2013   | andere Erstsprache      | nach 2001 | unauffällig | nicht deutsch | ja  | HLL | pB + BLT | - | klein | lang  | Wü     | 1300 | 1.14 | 0.17 | (-)  | (-)  | (-) | (-) | (-)  | (-)  | (-)  | (-)  | (-) | (-) | (-) |
| Schöppe et al., 2013   | Deutsch als Erstsprache | nach 2001 | unauffällig | deutsch       | ja  | HLL | pB + BLT | - | klein | lang  | Wü     | 1300 | 0.67 | 0.10 | (-)  | (-)  | (-) | (-) | (-)  | (-)  | (-)  | (-)  | (-) | (-) | (-) |
| Stahn, 2006            |                         | nach 2001 | unauffällig | deutsch       | ja  | HLL | pB       | - | groß  | kurz  | andere | 1300 | (-)  | (-)  | 0.15 | 0.04 | (-) | (-) | (-)  | (-)  | (-)  | (-)  | (-) | (-) | (-) |
| Treutlein et al., 2008 |                         | nach 2001 | unauffällig | deutsch       | (-) | HLL | pB + BLT | - | (-)   | keine | andere | 1040 | (-)  | (-)  | (-)  | (-)  | (-) | (-) | 0.26 | 0.05 | 0.44 | 0.03 | (-) | (-) | (-) |

## Fördermaßnahmen in der Schule

| Studie                  | Merkmale der Untersuchung               |                       | Merkmale der Stichprobe |                   |                                   | Merkmale der Förderung      |                                    |                                  | Implementationsqualität   |                          |                             | pB (kurzfristig) |       | pB (mittelfristig) |       | DF (kurz- bis mittelfristig) |       | DF (langfristig) |       | LV (kurz- bis langfristig) |       | RS (kurz- bis mittelfristig) |       | RS (langfristig) |       |      |
|-------------------------|-----------------------------------------|-----------------------|-------------------------|-------------------|-----------------------------------|-----------------------------|------------------------------------|----------------------------------|---------------------------|--------------------------|-----------------------------|------------------|-------|--------------------|-------|------------------------------|-------|------------------|-------|----------------------------|-------|------------------------------|-------|------------------|-------|------|
|                         | Untersuchungsgruppen                    | Jahr der Untersuchung | Ausgangskompetenzen     | Sprachhintergrund | Vergleichbare Ausgangskompetenzen | Förderprogramm <sup>1</sup> | Inhalte der Förderung <sup>2</sup> | weitere Inhalte (x) <sup>3</sup> | Gruppengröße <sup>4</sup> | Schulung der Förderkraft | Forschergruppe <sup>5</sup> | Dauer in Minuten | g     | v                  | g     | v                            | g     | v                | g     | v                          | g     | v                            | g     | v                | g     | v    |
| Einsiedler et al., 2002 | schwache Ausgangskompetenzen            | bis 2001              | schwach                 | deutsch           | nein                              | Hexe Susi                   | pB + X                             | moL, sL                          | groß                      | keine                    | andere                      | 2400             | 0.52  | 0.03               | (-)   | (-)                          | 0.06  | 0.06             | (-)   | (-)                        | 0.12  | 0.06                         | -0.15 | 0.06             | (-)   | (-)  |
| Einsiedler et al., 2002 | unauffällige Ausgangskompetenzen        | bis 2001              | unauffällig             | deutsch           | ja                                | Hexe Susi                   | pB + X                             | moL, sL                          | groß                      | keine                    | andere                      | 2400             | -0.15 | 0.13               | (-)   | (-)                          | -0.12 | 0.05             | (-)   | (-)                        | -0.36 | 0.05                         | -0.52 | 0.05             | (-)   | (-)  |
| Fröhlich et al., 2011   | Förderung im ersten Schuljahr           | nach 2001             | unauffällig             | deutsch           | ja                                | Globo_S                     | pB + BLT + X                       | Tv, dK                           | groß                      | kurz                     | andere                      | 1800             | 0.34  | 0.02               | (-)   | (-)                          | (-)   | (-)              | (-)   | (-)                        | (-)   | (-)                          | (-)   | (-)              | (-)   | (-)  |
| Hatz & Sachse, 2010     | pB-Förderung und BLT                    | nach 2001             | schwach                 | deutsch           | nein                              | MÜT                         | pB + BLT                           | -                                | klein                     | kurz                     | andere                      | (-)              | 0.32  | 0.04               | -0.08 | 0.05                         | -0.04 | 0.05             | -0.17 | 0.06                       | (-)   | (-)                          | 0.01  | 0.05             | -0.13 | 0.06 |
| Hatz & Sachse, 2010     | pB-Förderung und BLT und Rechtschreiben | nach 2001             | schwach                 | deutsch           | nein                              | MÜT                         | pB + BLT + X                       | Rt                               | klein                     | kurz                     | andere                      | (-)              | 0.09  | 0.05               | (-)   | (-)                          | 0.11  | 0.05             | -0.13 | 0.06                       | (-)   | (-)                          | 0.40  | 0.05             | -0.03 | 0.06 |
| Mannhaupt et al., 1999  |                                         | bis 2001              | schwach                 | deutsch           | nein                              | MÜT                         | pB + X                             | bL                               | klein                     | lang                     | andere                      | (-)              | -0.55 | 0.14               | -0.11 | 0.04                         | -0.09 | 0.04             | (-)   | (-)                        | (-)   | (-)                          | -0.08 | 0.04             | (-)   | (-)  |
| Metz et al., 2011       |                                         | nach 2001             | unauffällig             | deutsch           | nein                              | Globo_S                     | pB + BLT + X                       | Tv, dK                           | groß                      | keine                    | andere                      | 1080             | 0.66  | 0.01               | (-)   | (-)                          | (-)   | (-)              | (-)   | (-)                        | 0.69  | 0.02                         | (-)   | (-)              | 0.37  | 0.02 |
| Rothe, 2007             | Förderung im ersten Schuljahr           | bis 2001              | unauffällig             | deutsch           | nein                              | Hexe Susi                   | pB + BLT + X                       | sL                               | groß                      | lang                     | andere                      | 2860             | (-)   | (-)                | (-)   | (-)                          | -0.37 | 0.04             | (-)   | (-)                        | (-)   | (-)                          | -0.29 | 0.09             | (-)   | (-)  |
| Wimmer & Hartl, 1991    |                                         | bis 2001              | schwach                 | deutsch           | ja                                | B&B                         | pB + X                             | multiVor                         | einzel                    | keine                    | andere                      | 1000             | (-)   | (-)                | (-)   | (-)                          | -0.04 | 0.20             | (-)   | (-)                        | (-)   | (-)                          | 0.07  | 0.20             | (-)   | (-)  |

Anmerkungen: pB = phonologische Bewusstheit, DF = Dekodierfähigkeit, LV = Leseverständnis, RS = Rechtschreib = Effektstärke (ungewichtet), v = Samplingvarianz, BLT = Buchstaben-Laut-Training, 1 B&B = Eigenentwicklung nach dem Programm von Bryant & Bradley, EE = Eigenentwicklung, Globo\_K = Globo vom Lobo (Kita), Globo\_S = Globo vom Lobo (Schule), Globo\_E = Globo vom Lobo (Eltern), Heifer = Heifer-Methode, HLL = Hören, lauschen, lernen, LuL = Lass uns Lesen, MÜT = Münsteraner Trainingsprogramm, PPP = piff, puff, Hexe Susi = Leichter lesen und schreiben lernen mit der Hexe Süsk= weitere Förderinhalte, Tv = Textverständnis, dK = dialogische Kompetenz, sL = schnelles Lesen, dL = dialogisches Lesen, moL = metakognitiv orientierte Lernstrategie, Rt = Rechtschreibtraining, bL = basale Lesehandlung, multiVor = multisensorisches Vorgehen beim Einprägen von Wortschreibungeinzel = Einzelförderung, klein = Förderung in Kleingruppen mit bis zu zwölf Kindern, groß = Förderung in größeren Fördergruppen mit mehr als zwölf Kindern, Wü = Würzburger Forschergruppe, andere = andere Forschergruppe
