# Supplementary material for: Metaanalyse zur Wirksamkeit einer Förderung der phonologischen Bewusstheit in der deutschen Sprache
Source: Atypon-hosted journal article supplement (doi:10.1024/1010-0652/a000165), 2016-02-01

## Phon. Bewusstheit – kurzfristige Effekte

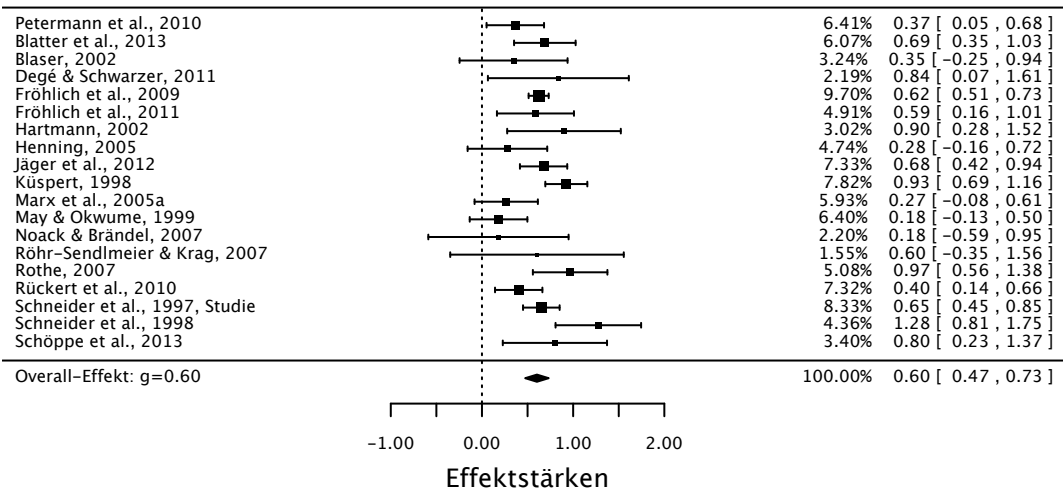

## Phon. Bewusstheit – mittelfristige Effekte

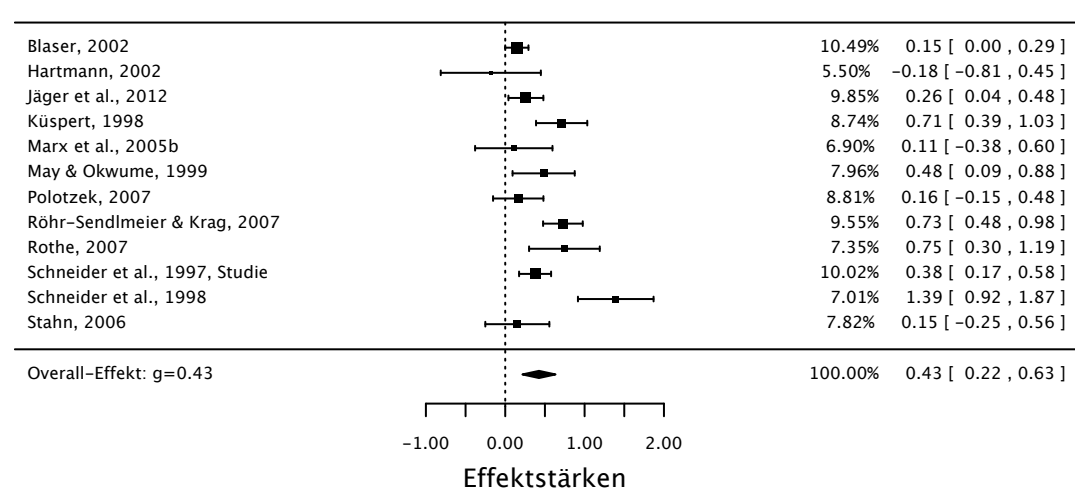

## Dekodierfähigkeit – kurz-/mittelfristige Effekte

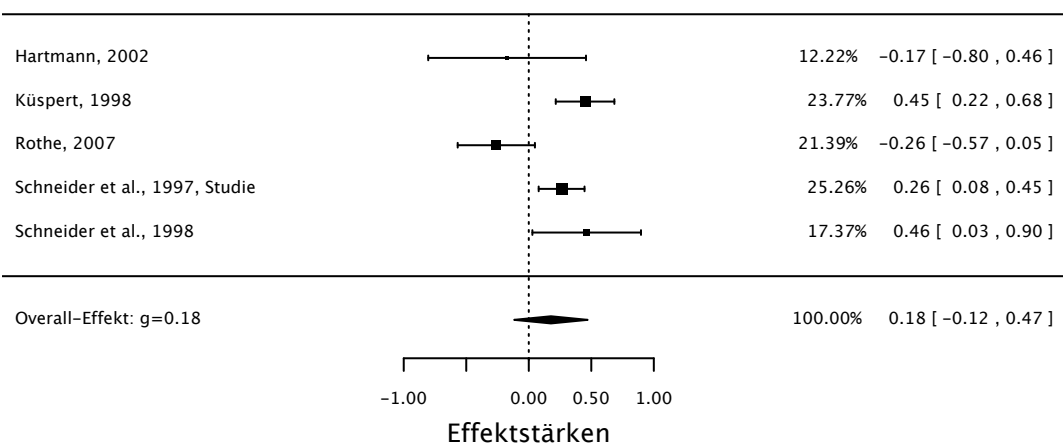

## Dekodierfähigkeit – langfristige Effekte

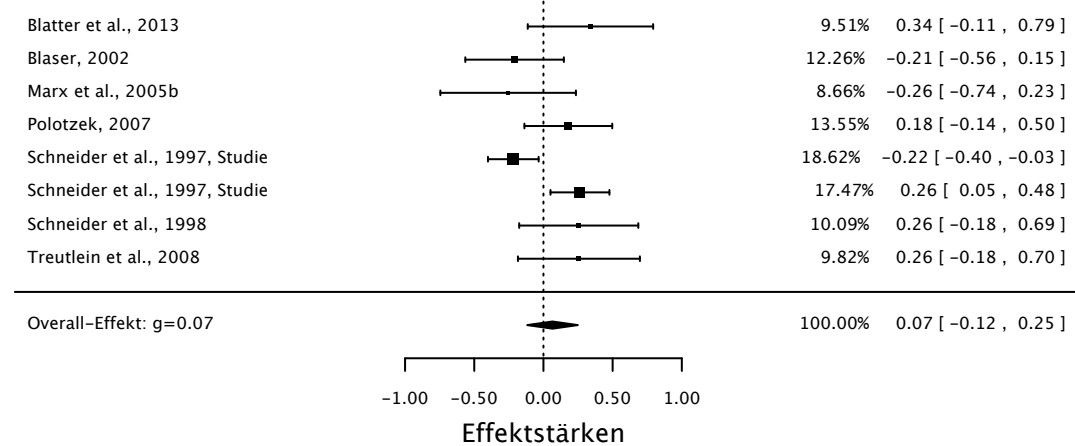

## Rechtschreiben – kurz-/mittelfristige Effekte

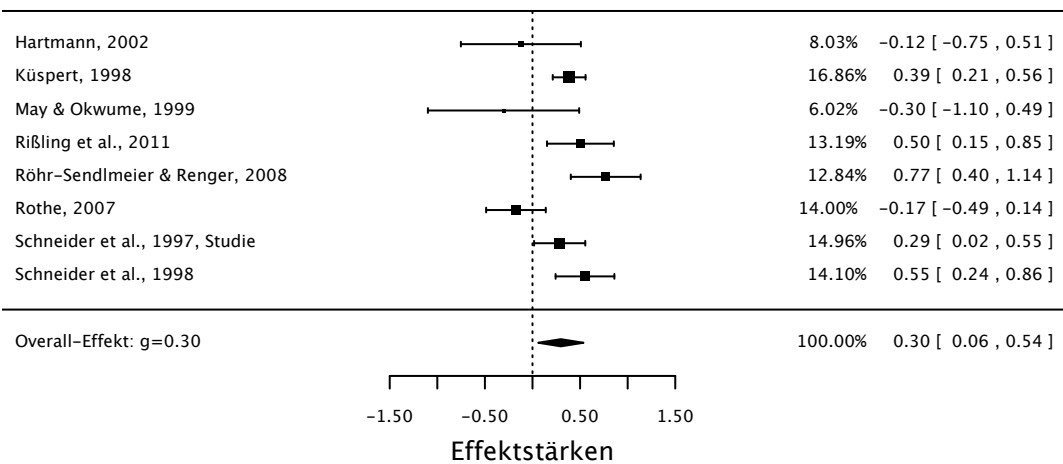

## Rechtschreiben – langfristige Effekte

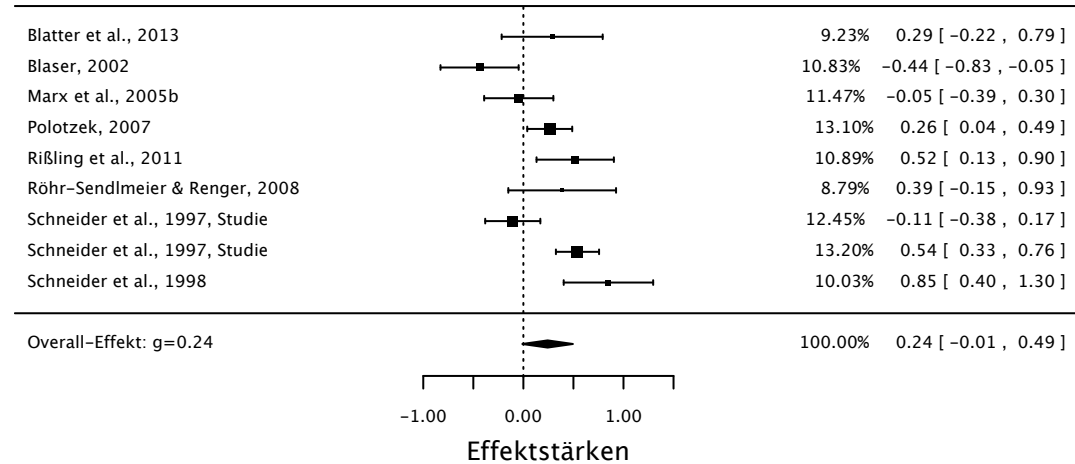

Supplement: 1010-0652_a000165_esm2.pdf [file 1010-0652_a000165_esm2.pdf]
